# Supplementary material
Source: Springer Nature journal article supplement (https://www.springermedizin.de/resource/supplementary/12885_2014_4977_MOESM1_ESM.pdf/9467938)
Supplement: MOESM1 [file 9467938]

AYA aged 15-21 diagnosed with  
malignancy in Ontario 1992 – 2011  
n=5,349

Primary Treatment

Adult Centres  
n=4,319

Pediatric Centres  
n=1,030

Regional Cancer Centre

Community Hospital
